# Supplementary material for: Vitrimerization of crosslinked elastomers: a mechanochemical approach for recycling thermoset polymers
Source: Royal Society of Chemistry journal article supplement (doi:10.1039/d3ma00098b), 2023-01-01
Supplement: d3ma00098b1.pdf [file d3ma00098b1.pdf]

## Supporting Information

### **Vitrimerization of Crosslinked Elastomers: A Mechanochemical Approach for Recycling Thermoset Polymers**

Alireza Bandegi<sup>1</sup>, Thomas G. Gray<sup>2\*</sup>, Sarah Mitchell<sup>3</sup>, Amin Jamei Oskouei<sup>1</sup>, Michelle K. Sing<sup>3</sup>, Jayme Kennedy<sup>3</sup>, Kimberly Miller McLoughlin<sup>3</sup>, Ica Manas-Zloczower<sup>1</sup>

<sup>1</sup> Department of Macromolecular Science and Engineering, Case Western Reserve University, 10900 Euclid Avenue, Cleveland, OH 44106

<sup>2</sup> Department of Chemistry, Case Western Reserve University, 10900 Euclid Avenue, Cleveland, OH 44106

<sup>3</sup> Braskem America, 550 Technology Drive, Pittsburgh, PA 15219

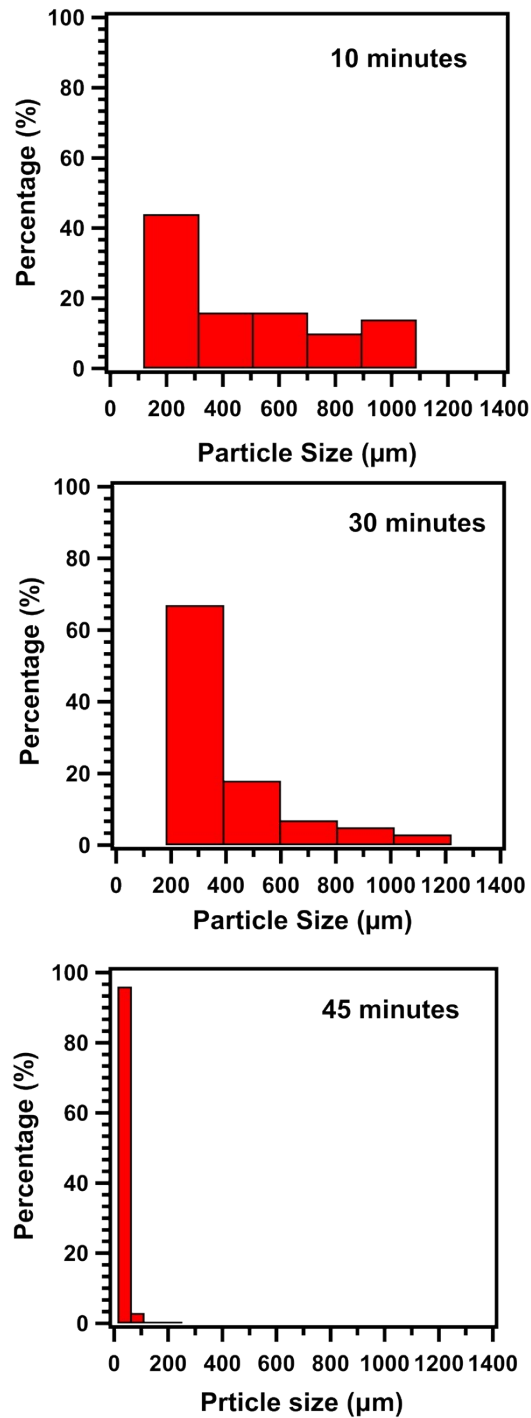

**Figure S1.** Particle size distribution of crosslinked EVA powders after cryomilling for 10, 30, and 45 minutes, (the particle size larger than 1 mm is related to the agglomeration of some powders under microscope)

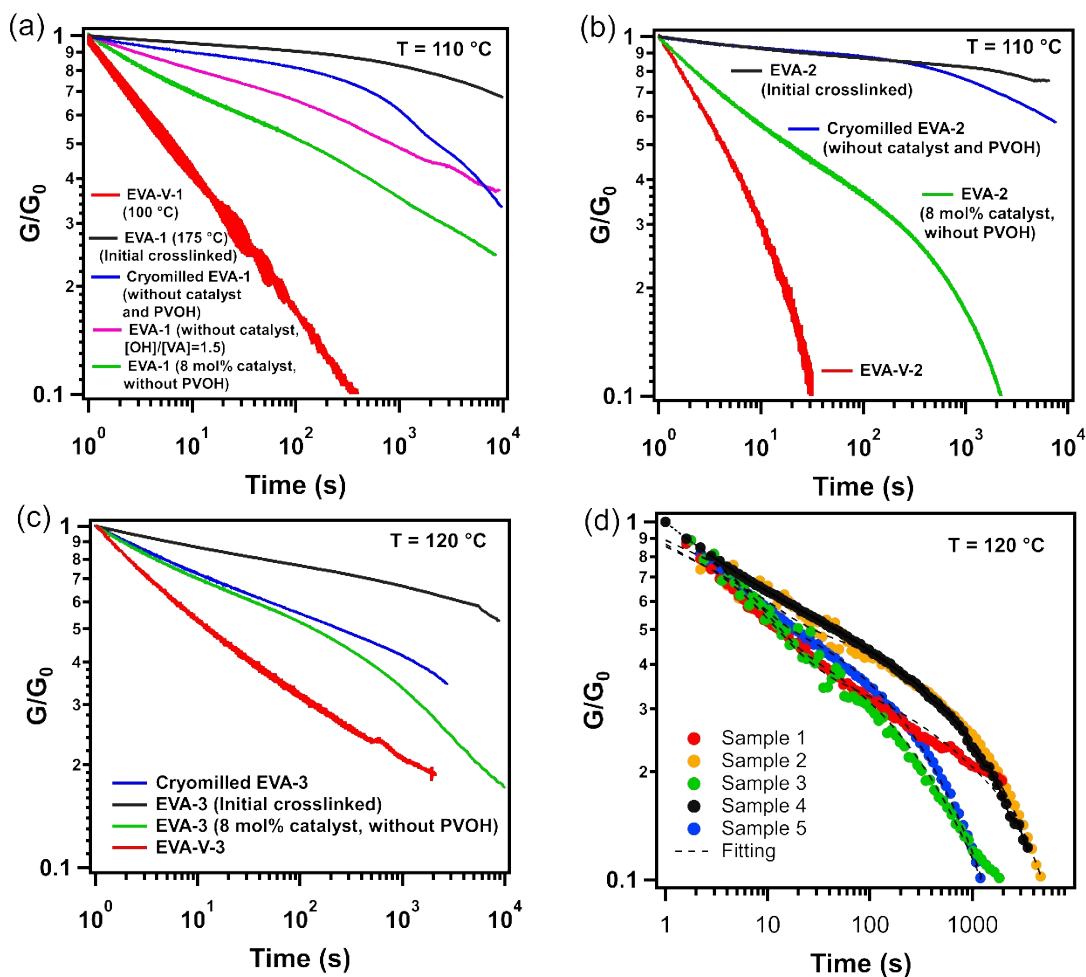

**Figure S2.** Stress relaxation curves of initial crosslinked EVAs, vitrimerized EVAs with addition of either catalyst or PVOH for (a) EVA-1, (b) EVA-2, (c) EVA-3. (d) Stress relaxation curves of EVA-3 at 120 °C on five separate samples. The  $G_0$  is considered as initial stress at time equal to one second ( $t = 1$ s). The mol% of catalyst is with respect to VA.

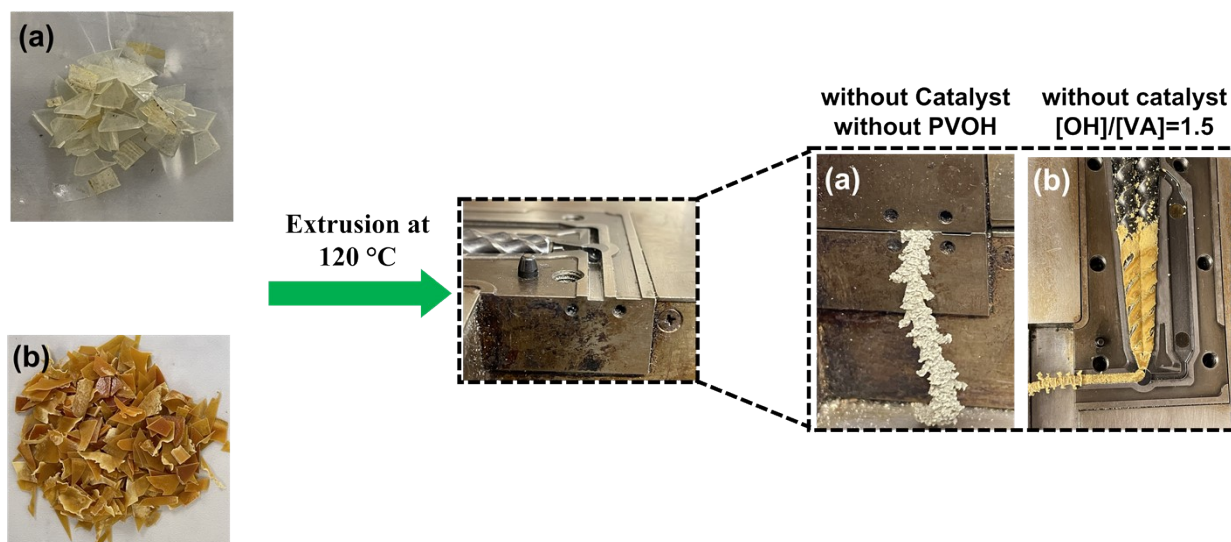

**Figure S3.** Unsuccessful reprocessing of compression molded EVA powders (a) without addition of catalyst and PVOH (b) with PVOH and without addition of catalyst.

**Table S1.** Swelling ratio of initial crosslinked and vitrimerized EVAs in toluene and water.

| Solvent            | EVA1 | EVA2 | EVA3 | EVA-V-1 | EVA-V-2 | EVA-V-3 |
|--------------------|------|------|------|---------|---------|---------|
| Toluene (100 °C)   | 504  | 569  | 347  | 1901    | 2080    | 980     |
| Water (100 °C)     | 4    | 25   | 26   | 50      | 42      | 70      |
| Water (25 °C)      | 2    | 11   | 24   | 6       | 13      | 40      |
| Solvent            | EVA1 | EVA2 | EVA3 | EVA-V-1 | EVA-V-2 | EVA-V-3 |
| Crystallinity (%)  | 15   | 10   | 22   | 11      | 5       | 20      |
| Melting point (°C) | 80   | 77   | 94   | 86      | 78      | 98      |

**Table S2.** Crystallinity

and melting temperature of initial crosslinked and vitrimerized EVAs.

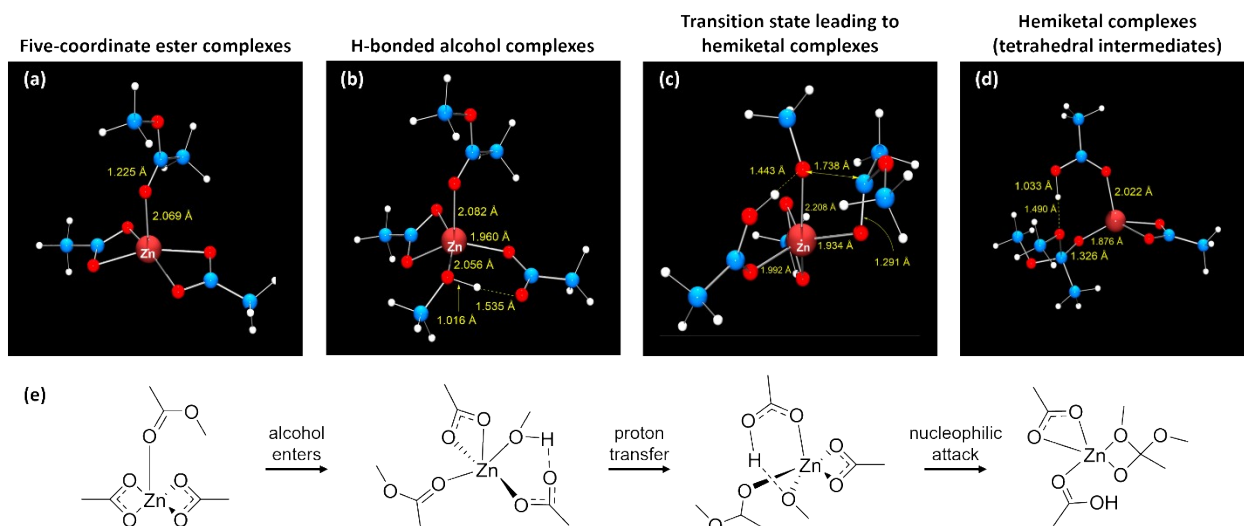

**Figure S4.** Optimized geometries for the methyl acetate complex; (a) five-coordinate ester complex; (b) hydrogen-bonded alcohol complex were alcohol complexes to zinc; (c) transition state leading indicating a proton transfer prior to forming tetrahedral carbon; (d) hemiketal complex (tetrahedral intermediates); (e) step-by-step formation of hemiketal complex. Legend: large red spheres (zinc), small red spheres (oxygen), blue spheres (carbon), and white spheres (hydrogen).

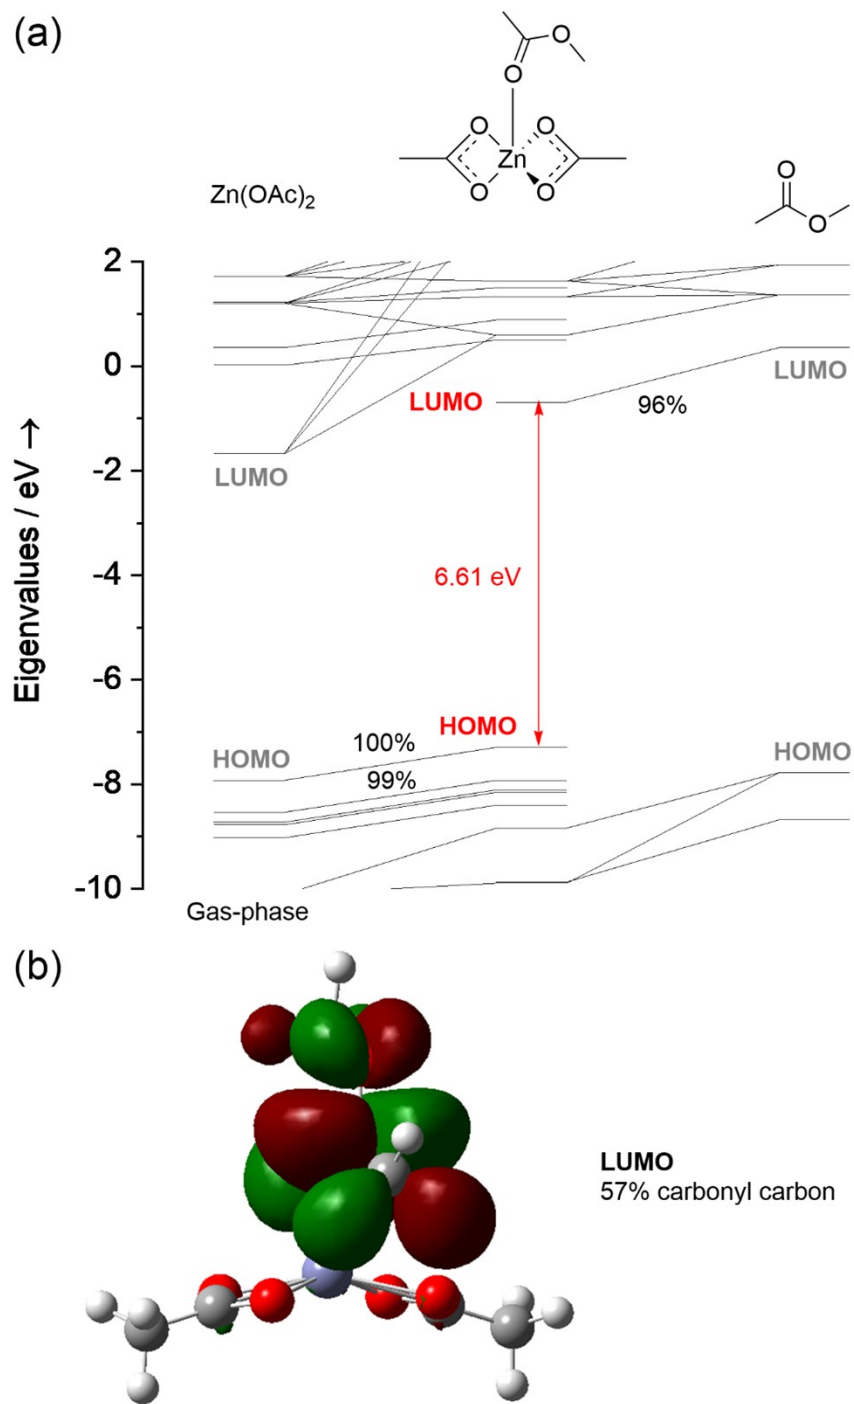

**Figure S5.** (a) Partial Kohn-Sham orbital energy level diagram of a five-coordinate zinc acetate complex with methyl acetate. (b) Depiction of the LUMO. Contour level 0.02 a.u. Percentages are of orbital density. The corresponding diagram for the isopropyl acetate complex is similar.

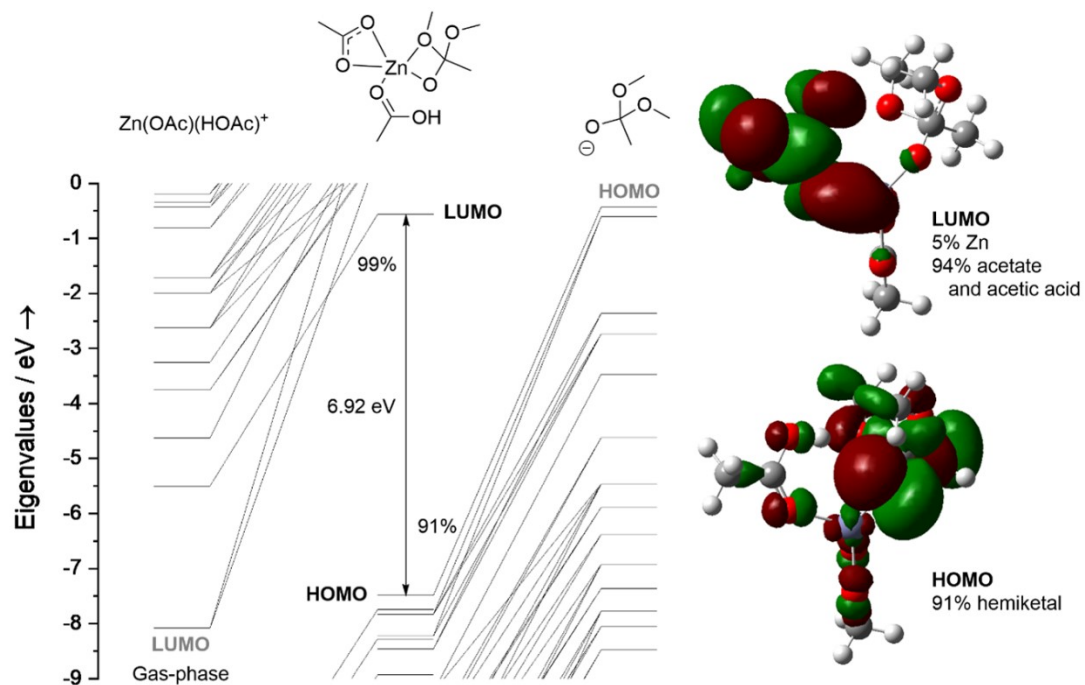

**Figure S6.** (a) Partial Kohn-Sham orbital energy level diagram of the hemiketal zinc complex formed with methanol and methyl acetate. (b) Depiction of frontier orbitals. Contour level 0.02 a.u. Percentages are of orbital density. The corresponding diagram for the isopropyl analogue is similar.

**Table S3.** Parameters obtained from fitting stress relaxation curves to experimental data for EVA-1 using equation 1.

| Temperature (°C) | $\tau_{net}$ (seconds) | $\tau_{ex}$ (seconds) | $\beta_{net}$ | $\beta_{ex}$ | $A_{net}$ | $A_{ex}$  | Adjusted $R^2$ |
|------------------|------------------------|-----------------------|---------------|--------------|-----------|-----------|----------------|
| 80               | 73594±337              | 20.0±0.05             | 0.33±0.00     | 0.48±0.00    | 0.61±0.00 | 0.39±0.00 | 0.9926         |
| 85               | 1360±34                | 10.0±0.03             | 0.30±0.00     | 0.70±0.00    | 0.53±0.00 | 0.47±0.00 | 0.9924         |
| 90               | 113±3                  | 5.0±0.02              | 0.41±0.00     | 0.97±0.01    | 0.46±0.00 | 0.54±0.01 | 0.9903         |
| 100              | 123±5                  | 5.0±0.23              | 0.40±0.01     | 0.90±0.01    | 0.47±0.00 | 0.53±0.01 | 0.9878         |

**Table S4.** Parameters obtained from fitting stress relaxation curves to experimental data for EVA-2 using equation 1.

| Temperature (°C) | $\tau_{net}$ (seconds) | $\tau_{ex}$ (seconds) | $\beta_{net}$ | $\beta_{ex}$ | $A_{net}$ | $A_{ex}$  | Adjusted $R^2$ |
|------------------|------------------------|-----------------------|---------------|--------------|-----------|-----------|----------------|
| 80               | 50870±20956            | 24.59±0.03            | 0.99±0.00     | 0.44±0.00    | 0.69±0.00 | 0.31±0.00 | 0.9963         |
| 90               | 85061±605              | 7.80±0.02             | 0.24±0.00     | 0.72±0.00    | 0.62±0.00 | 0.38±0.00 | 0.9903         |
| 100              | 42±0                   | 3.87±0.01             | 0.81±0.01     | 1.00±0.01    | 0.39±0.00 | 0.62±0.01 | 0.9968         |
| 110              | 27±0                   | 3.80±0.01             | 1.00±0.01     | 1.00±0.01    | 0.36±0.00 | 0.64±0.05 | 0.9860         |

**Table S5.** Parameters obtained from fitting stress relaxation curves to experimental data for EVA-3 using equation 1.

| Temperature (°C) | $\tau_{net}$ (seconds) | $\tau_{ex}$ (seconds) | $\beta_{net}$ | $\beta_{ex}$ | $A_{net}$ | $A_{ex}$  | Adjusted $R^2$ |
|------------------|------------------------|-----------------------|---------------|--------------|-----------|-----------|----------------|
| 80               | 53007±383              | 48.35±0.07            | 0.37±0.01     | 0.47±0.00    | 0.71±0.00 | 0.29±0.01 | 0.9959         |
| 100              | 6766±77                | 9.87±0.02             | 0.29±0.00     | 0.71±0.00    | 0.60±0.00 | 0.40±0.00 | 0.9940         |
| 110              | 1114±15                | 6.48±0.02             | 0.33±0.00     | 0.88±0.00    | 0.59±0.00 | 0.41±0.00 | 0.9927         |
| 120              | 1546±42                | 6.87±0.02             | 0.32±0.00     | 0.78±0.01    | 0.49±0.00 | 0.51±0.00 | 0.9880         |

**Table S6.** Parameters obtained from fitting stress relaxation curves to experimental data (repeated for five times) measured at 120 °C for EVA-3.

| Temperature (°C) | $\tau_{net}$ (seconds) | $\tau_{ex}$ (seconds) | $\beta_{net}$ | $\beta_{ex}$ | $A_{net}$ | $A_{ex}$  | Adjusted $R^2$ |
|------------------|------------------------|-----------------------|---------------|--------------|-----------|-----------|----------------|
| 120              | 297±2                  | 4.87±0.01             | 0.43±0.00     | 1.00±0.01    | 0.65±0.00 | 0.35±0.00 | 0.9969         |
| 120              | 270±6                  | 6.71±0.02             | 0.39±0.00     | 1.00±0.01    | 0.61±0.00 | 0.39±0.00 | 0.9809         |
| 120              | 1445±10                | 4.98±0.02             | 0.46±0.00     | 0.73±0.01    | 0.57±0.00 | 0.43±0.00 | 0.9814         |
| 120              | 1546±42                | 6.87±0.02             | 0.32±0.00     | 0.78±0.01    | 0.49±0.00 | 0.51±0.00 | 0.9880         |
| 120              | 713±4                  | 5.90±0.01             | 0.37±0.00     | 1.00±0.00    | 0.72±0.00 | 0.28±0.00 | 0.9970         |



**Table S7.** Optimized Cartesian coordinates (Å) in .xyz format.

A. Five-coordinate ester complexes

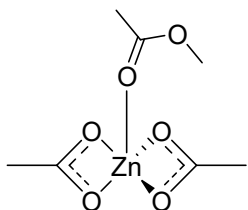

26

|    |           |           |           |
|----|-----------|-----------|-----------|
| O  | -0.466207 | 1.828632  | 1.031184  |
| O  | -0.992436 | 1.982150  | -1.085262 |
| C  | -0.746930 | 2.534862  | 0.024714  |
| C  | -0.820669 | 4.025362  | 0.143363  |
| H  | -0.552595 | 4.497965  | -0.800058 |
| H  | -1.853673 | 4.297400  | 0.375270  |
| H  | -0.185847 | 4.379318  | 0.953545  |
| O  | -1.752452 | -1.373719 | -1.072816 |
| O  | -1.149479 | -1.502497 | 1.024838  |
| C  | -1.728351 | -2.003508 | 0.024289  |
| C  | -2.415983 | -3.329264 | 0.128113  |
| H  | -3.478191 | -3.148790 | 0.312176  |
| H  | -2.330209 | -3.876270 | -0.809711 |
| H  | -2.015887 | -3.909113 | 0.957391  |
| Zn | -0.684263 | 0.146869  | -0.237280 |
| O  | 1.320651  | -0.283109 | -0.512194 |
| C  | 2.120068  | -0.454715 | 0.399713  |
| C  | 1.785924  | -0.382712 | 1.843178  |
| H  | 2.659426  | -0.563316 | 2.463680  |
| H  | 1.354311  | 0.600419  | 2.047286  |
| H  | 0.999314  | -1.113110 | 2.049039  |
| O  | 3.381495  | -0.726348 | 0.146845  |
| C  | 3.752372  | -0.807281 | -1.233528 |
| H  | 3.558828  | 0.142134  | -1.732134 |
| H  | 4.814891  | -1.034590 | -1.234978 |
| H  | 3.187220  | -1.595639 | -1.730093 |

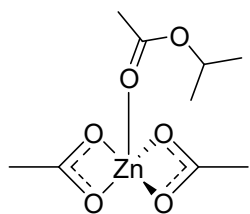

32

|    |           |           |          |
|----|-----------|-----------|----------|
| O  | 7.288787  | -0.807449 | 3.970442 |
| O  | 6.996545  | -0.660897 | 1.807844 |
| C  | 7.015617  | -1.351674 | 2.871164 |
| C  | 6.730990  | -2.819469 | 2.789664 |
| H  | 5.885117  | -2.999810 | 2.126453 |
| H  | 7.600466  | -3.315708 | 2.351867 |
| H  | 6.544737  | -3.235431 | 3.777249 |
| O  | 8.312449  | 2.525575  | 1.703066 |
| O  | 8.963856  | 2.155637  | 3.757184 |
| C  | 9.049079  | 2.817997  | 2.683742 |
| C  | 10.044429 | 3.930964  | 2.571942 |
| H  | 11.018841 | 3.494955  | 2.337347 |
| H  | 9.770449  | 4.616862  | 1.773027 |
| H  | 10.137044 | 4.454701  | 3.522555 |
| Zn | 7.471992  | 1.012959  | 2.836586 |
| O  | 5.784848  | 1.926702  | 3.583855 |
| C  | 5.572587  | 2.135386  | 4.773942 |
| C  | 6.470447  | 1.691544  | 5.870380 |
| H  | 6.080682  | 1.975927  | 6.843982 |
| H  | 6.594351  | 0.608451  | 5.796112 |
| H  | 7.458890  | 2.127320  | 5.702764 |
| O  | 4.506502  | 2.782788  | 5.177387 |
| C  | 3.574861  | 3.271873  | 4.170858 |
| C  | 4.092929  | 4.572570  | 3.603075 |
| C  | 2.247367  | 3.405638  | 4.873162 |
| H  | 3.524044  | 2.514782  | 3.385995 |
| H  | 5.054790  | 4.431071  | 3.109876 |
| H  | 3.386556  | 4.955339  | 2.863862 |
| H  | 4.199730  | 5.318594  | 4.393868 |
| H  | 1.926761  | 2.449792  | 5.289869 |
| H  | 2.309822  | 4.135981  | 5.682691 |
| H  | 1.490116  | 3.743004  | 4.163285 |

B. Hydrogen-bonded alcohol complexes.

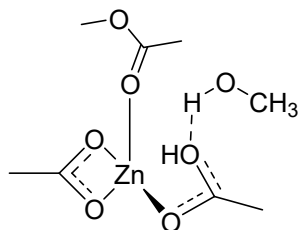

32

|    |           |           |           |
|----|-----------|-----------|-----------|
| O  | 7.459567  | -0.523440 | 3.530008  |
| O  | 6.240241  | -1.718444 | 2.082865  |
| C  | 6.907394  | -1.601678 | 3.122294  |
| C  | 7.106221  | -2.799733 | 4.012516  |
| H  | 6.636013  | -3.682042 | 3.584677  |
| H  | 8.174490  | -2.972139 | 4.154695  |
| H  | 6.681065  | -2.593364 | 4.997070  |
| O  | 8.844712  | 2.165910  | 1.516673  |
| O  | 8.815937  | 2.456198  | 3.684226  |
| C  | 9.329976  | 2.690311  | 2.566142  |
| C  | 10.535627 | 3.571565  | 2.440451  |
| H  | 11.405149 | 2.941619  | 2.237913  |
| H  | 10.418738 | 4.246684  | 1.592653  |
| H  | 10.707317 | 4.130359  | 3.357715  |
| O  | 5.803323  | 2.174361  | 3.457843  |
| C  | 5.634787  | 2.321525  | 4.660004  |
| C  | 6.536257  | 1.801246  | 5.717489  |
| H  | 6.104354  | 1.930331  | 6.706358  |
| H  | 6.756270  | 0.752280  | 5.510026  |
| H  | 7.486747  | 2.334828  | 5.636017  |
| O  | 4.597702  | 2.991227  | 5.118370  |
| C  | 3.707434  | 3.531582  | 4.137129  |
| H  | 3.297956  | 2.733524  | 3.518321  |
| H  | 2.920917  | 4.026668  | 4.700287  |
| H  | 4.233980  | 4.243432  | 3.501662  |
| Zn | 7.405998  | 1.185437  | 2.571008  |
| O  | 6.278921  | 0.551852  | 0.972634  |
| C  | 6.805049  | 0.575559  | -0.343242 |
| H  | 7.177336  | 1.578488  | -0.546539 |
| H  | 7.634218  | -0.129362 | -0.454781 |
| H  | 6.021396  | 0.324752  | -1.063162 |
| H  | 6.157469  | -0.405540 | 1.291159  |

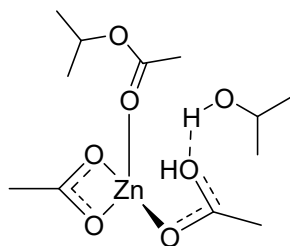

44

|    |           |           |           |
|----|-----------|-----------|-----------|
| O  | -2.222933 | -0.595478 | 1.175870  |
| O  | -2.815567 | 0.757549  | -0.504646 |
| C  | -3.066981 | 0.098800  | 0.522577  |
| C  | -4.468621 | 0.090521  | 1.069766  |
| H  | -5.127830 | 0.704230  | 0.460161  |
| H  | -4.835238 | -0.937323 | 1.100672  |
| H  | -4.456716 | 0.455906  | 2.098261  |
| O  | 1.195904  | -1.989141 | 0.296068  |
| O  | 0.660959  | -1.601090 | 2.378781  |
| C  | 1.360869  | -2.211771 | 1.531147  |
| C  | 2.374382  | -3.221355 | 1.975506  |
| H  | 3.233830  | -3.218917 | 1.306282  |
| H  | 2.679190  | -3.035866 | 3.003477  |
| H  | 1.915644  | -4.212151 | 1.924279  |
| Zn | -0.307210 | -0.605543 | 0.828811  |
| O  | 0.374101  | 1.315940  | 1.248233  |
| C  | 0.571611  | 2.242509  | 0.473826  |
| C  | -0.386139 | 3.372063  | 0.323048  |
| H  | -1.299406 | 2.965908  | -0.121712 |
| H  | -0.646430 | 3.752052  | 1.311242  |
| H  | 0.014002  | 4.164822  | -0.303866 |
| O  | 1.628688  | 2.338002  | -0.291959 |
| C  | 2.587314  | 1.241778  | -0.298969 |
| C  | 3.496049  | 1.352436  | 0.902329  |
| C  | 3.310513  | 1.344613  | -1.617482 |
| H  | 2.022022  | 0.309987  | -0.257857 |
| H  | 2.930603  | 1.272306  | 1.830714  |
| H  | 4.225484  | 0.540338  | 0.878639  |
| H  | 4.037984  | 2.301062  | 0.889974  |
| H  | 2.607466  | 1.284189  | -2.449372 |
| H  | 3.859807  | 2.285931  | -1.689978 |
| H  | 4.021090  | 0.521185  | -1.707561 |
| O  | -0.464891 | 0.078086  | -1.155247 |
| H  | -1.428309 | 0.388427  | -1.070441 |

|   |           |           |           |
|---|-----------|-----------|-----------|
| C | -0.279030 | -0.764832 | -2.293079 |
| C | -0.443794 | 0.057423  | -3.554105 |
| C | -1.215987 | -1.954357 | -2.245421 |
| H | 0.751250  | -1.123079 | -2.215591 |
| H | 0.228584  | 0.917508  | -3.542934 |
| H | -0.223438 | -0.543894 | -4.438957 |
| H | -1.469906 | 0.425945  | -3.639130 |
| H | -1.047553 | -2.539249 | -1.339170 |
| H | -2.258193 | -1.624422 | -2.264780 |
| H | -1.047881 | -2.607493 | -3.104645 |

C. Transition states for intramolecular nucleophilic attack.

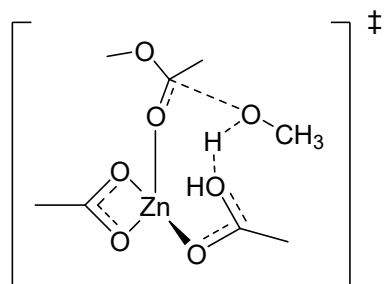

32

|    |           |           |          |
|----|-----------|-----------|----------|
| O  | 7.676586  | -0.400839 | 4.751632 |
| O  | 7.078032  | -1.196310 | 2.795977 |
| C  | 7.502131  | -1.390388 | 3.971804 |
| C  | 7.809821  | -2.776605 | 4.454510 |
| H  | 7.285668  | -2.960451 | 5.396674 |
| H  | 7.524272  | -3.521914 | 3.711815 |
| H  | 8.882051  | -2.854211 | 4.661116 |
| O  | 8.261877  | 1.678754  | 1.961408 |
| O  | 8.102270  | 3.799811  | 2.681566 |
| C  | 8.506499  | 2.892030  | 1.850314 |
| C  | 9.301627  | 3.405748  | 0.692738 |
| H  | 9.783856  | 2.579898  | 0.170396 |
| H  | 8.624069  | 3.922131  | 0.003958 |
| H  | 10.039458 | 4.135164  | 1.035465 |
| Zn | 7.010280  | 0.802552  | 3.239354 |
| O  | 6.943538  | 2.594339  | 4.527772 |
| C  | 5.242684  | 2.298534  | 4.328305 |
| C  | 4.883689  | 1.522954  | 5.572260 |
| H  | 4.934160  | 2.142803  | 6.469675 |
| H  | 3.854853  | 1.172152  | 5.448504 |
| H  | 5.543167  | 0.658149  | 5.675500 |
| O  | 4.663669  | 3.521817  | 4.372686 |
| C  | 4.635208  | 4.237912  | 3.147009 |
| H  | 4.134140  | 3.656839  | 2.369377 |
| H  | 4.080689  | 5.154101  | 3.355391 |
| H  | 5.646470  | 4.491067  | 2.811793 |
| O  | 5.286875  | 1.678333  | 3.196687 |
| H  | 7.553622  | 3.359309  | 3.466588 |
| C  | 7.449547  | 2.971497  | 5.789750 |
| H  | 8.460369  | 3.375889  | 5.660144 |

|   |          |          |          |
|---|----------|----------|----------|
| H | 6.815864 | 3.750085 | 6.232903 |
| H | 7.502053 | 2.107934 | 6.460823 |

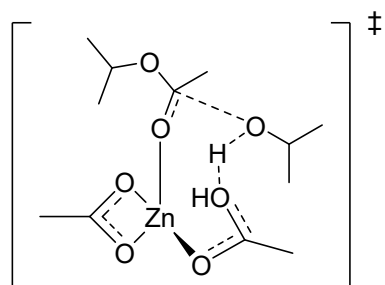

44

|    |           |           |           |
|----|-----------|-----------|-----------|
| O  | 7.678699  | -0.569543 | 3.538196  |
| O  | 6.922433  | -1.985124 | 1.978273  |
| C  | 7.457992  | -1.738290 | 3.069358  |
| C  | 7.899021  | -2.874763 | 3.953195  |
| H  | 7.687976  | -3.833427 | 3.485116  |
| H  | 8.967578  | -2.781100 | 4.155319  |
| H  | 7.384285  | -2.807816 | 4.913871  |
| O  | 8.615001  | 2.391554  | 1.773526  |
| O  | 8.511263  | 2.588020  | 3.955234  |
| C  | 8.988615  | 2.943973  | 2.864378  |
| C  | 10.024494 | 4.025641  | 2.774706  |
| H  | 10.953953 | 3.595840  | 2.395355  |
| H  | 9.704477  | 4.782762  | 2.057111  |
| H  | 10.200519 | 4.477019  | 3.748314  |
| Zn | 7.330977  | 1.105945  | 2.593206  |
| O  | 6.347979  | 0.278339  | 0.996202  |
| H  | 6.509529  | -0.693612 | 1.242084  |
| O  | 5.622083  | 1.913725  | 3.414618  |
| C  | 5.370214  | 2.045197  | 4.606263  |
| C  | 6.189399  | 1.480761  | 5.707688  |
| H  | 5.652221  | 1.503916  | 6.652437  |
| H  | 6.504503  | 0.470301  | 5.444820  |
| H  | 7.101183  | 2.081183  | 5.771740  |
| O  | 4.326981  | 2.730633  | 5.014209  |
| C  | 6.604281  | 0.520405  | -0.389568 |
| C  | 8.028821  | 0.151454  | -0.751902 |
| C  | 6.285889  | 1.969898  | -0.674064 |
| H  | 5.910657  | -0.117058 | -0.952148 |
| H  | 8.235336  | -0.890383 | -0.497169 |
| H  | 8.192075  | 0.278550  | -1.824909 |

|   |          |          |           |
|---|----------|----------|-----------|
| H | 8.732795 | 0.793347 | -0.216896 |
| H | 5.262396 | 2.202502 | -0.373424 |
| H | 6.973368 | 2.621177 | -0.129048 |
| H | 6.389111 | 2.177141 | -1.741239 |
| C | 3.497991 | 3.377927 | 4.010043  |
| C | 4.143482 | 4.680426 | 3.597310  |
| C | 2.142098 | 3.551975 | 4.646382  |
| H | 3.441143 | 2.701173 | 3.155231  |
| H | 5.127202 | 4.509051 | 3.159815  |
| H | 3.520783 | 5.178076 | 2.851195  |
| H | 4.246318 | 5.345182 | 4.457953  |
| H | 1.726100 | 2.590216 | 4.949845  |
| H | 2.207319 | 4.196867 | 5.525341  |
| H | 1.457884 | 4.012801 | 3.931688  |



D. Tetrahedral intermediates (hemiketal complexes)

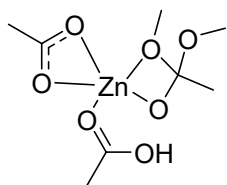

32

|    |           |           |          |
|----|-----------|-----------|----------|
| O  | 7.790005  | -0.697004 | 4.525820 |
| O  | 6.989497  | -1.416532 | 2.622368 |
| C  | 7.554866  | -1.649652 | 3.729138 |
| C  | 7.915870  | -3.051591 | 4.102982 |
| H  | 8.743835  | -3.059019 | 4.809163 |
| H  | 7.048582  | -3.510314 | 4.584995 |
| H  | 8.153469  | -3.633262 | 3.213994 |
| O  | 8.306671  | 1.509235  | 2.023735 |
| O  | 8.163081  | 3.631683  | 2.718383 |
| C  | 8.584451  | 2.706639  | 1.921705 |
| C  | 9.454650  | 3.193227  | 0.811861 |
| H  | 9.953059  | 2.356636  | 0.329621 |
| H  | 8.823973  | 3.706948  | 0.081730 |
| H  | 10.177081 | 3.917422  | 1.187519 |
| H  | 7.560114  | 3.281079  | 3.480652 |
| Zn | 6.918289  | 0.552688  | 3.139554 |
| O  | 6.813203  | 2.871778  | 4.702973 |
| C  | 5.407394  | 2.383891  | 4.485663 |
| C  | 4.998959  | 1.563434  | 5.692702 |
| H  | 4.902530  | 2.177639  | 6.588164 |
| H  | 4.030641  | 1.114268  | 5.474570 |
| H  | 5.730759  | 0.773075  | 5.867883 |
| O  | 4.572466  | 3.490824  | 4.447108 |
| C  | 4.620801  | 4.250291  | 3.257981 |
| H  | 4.376965  | 3.637713  | 2.388704 |
| H  | 3.880389  | 5.040939  | 3.374160 |
| H  | 5.605555  | 4.706608  | 3.107600 |
| O  | 5.461328  | 1.717352  | 3.340364 |
| C  | 7.059761  | 3.655894  | 5.852562 |
| H  | 8.003235  | 4.181638  | 5.696445 |
| H  | 6.259837  | 4.386078  | 5.996825 |
| H  | 7.150296  | 3.026403  | 6.741321 |

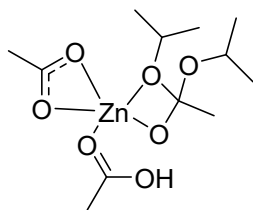

44

|    |           |           |           |
|----|-----------|-----------|-----------|
| O  | -1.987583 | 1.655665  | -0.281995 |
| O  | -2.944184 | -0.347209 | -0.020103 |
| C  | -2.982306 | 0.930919  | -0.216290 |
| C  | -4.353280 | 1.494622  | -0.377966 |
| H  | -5.026476 | 1.071821  | 0.367444  |
| H  | -4.324703 | 2.578797  | -0.310276 |
| H  | -4.729114 | 1.204141  | -1.362385 |
| O  | 1.000745  | 1.746766  | 1.208295  |
| O  | 1.022311  | 2.872438  | -0.665372 |
| C  | 1.396411  | 2.740699  | 0.532476  |
| C  | 2.330043  | 3.737689  | 1.141868  |
| H  | 2.191186  | 3.783648  | 2.220421  |
| H  | 3.354381  | 3.411542  | 0.942868  |
| H  | 2.192959  | 4.716951  | 0.686928  |
| H  | -1.983507 | -0.702307 | 0.095411  |
| Zn | -0.038449 | 1.125748  | -0.466665 |
| O  | -0.583231 | -1.223497 | 0.325033  |
| O  | 0.062941  | -0.354811 | -1.635000 |
| C  | 0.082306  | -1.522945 | -1.018015 |
| C  | -0.712415 | -2.601408 | -1.721500 |
| H  | -1.749843 | -2.285694 | -1.828803 |
| H  | -0.281826 | -2.745876 | -2.712125 |
| H  | -0.664384 | -3.545823 | -1.178757 |
| O  | 1.331027  | -2.067417 | -0.752474 |
| C  | -0.441716 | -2.142549 | 1.419413  |
| C  | -1.730542 | -2.907685 | 1.649661  |
| C  | -0.019775 | -1.350721 | 2.638099  |
| H  | 0.353679  | -2.837139 | 1.139201  |
| H  | -2.043278 | -3.441971 | 0.751378  |
| H  | -1.590139 | -3.639476 | 2.448268  |
| H  | -2.538377 | -2.235074 | 1.948895  |
| H  | 0.894345  | -0.788692 | 2.444751  |
| H  | -0.797174 | -0.634473 | 2.917106  |
| H  | 0.147860  | -2.018394 | 3.486366  |

|   |          |           |           |
|---|----------|-----------|-----------|
| C | 2.381174 | -1.187401 | -0.348089 |
| C | 3.132518 | -0.662172 | -1.554697 |
| C | 3.278221 | -1.980945 | 0.577030  |
| H | 1.956148 | -0.349987 | 0.217388  |
| H | 2.461102 | -0.123327 | -2.221205 |
| H | 3.934122 | 0.010294  | -1.238563 |
| H | 3.578787 | -1.494147 | -2.105651 |
| H | 2.734177 | -2.321441 | 1.459815  |
| H | 3.674334 | -2.856660 | 0.057276  |
| H | 4.118658 | -1.366986 | 0.907428  |
